# Supplementary material for: Novel triphenylamine based rhodamine derivatives: synthesis, characterization, photophysical properties and viscosity sensitivity
Source: Royal Society of Chemistry journal article supplement (doi:10.1039/c6ra19899f), 2016-01-01

Novel triphenylamine based rhodamine derivatives: Synthesis, characterization, photophysical properties and viscosity sensitivity

Shantaram Kothavale, Nagaiyan Sekar\*

Department of Dyestuff Technology, Institute of Chemical Technology, Matunga,

Mumbai-400 019, India.

E-mail: n.sekar@ictmumbai.edu.in, nethi.sekar@gmail.com

Tel: +91 22 3361 2707; Fax: +91 22 3361 1020.

---

**Supporting information**

**Scheme S1.** Synthesis of intermediate **A** and intermediate **B**

**List of figures**

**Figure S1.** Absorption spectra of dyes **RH-1** to **RH-5** for their spirocyclic and open form in chloroform solvent

**Figure S2.** Emission spectra of dyes **RH-1** to **RH-5** for their spirocyclic and open form in chloroform solvent

**Figure S3.** Absorption (a) and emission (b) spectra of **RH-1** in toluene, chloroform and ethanol solvent

**Figure S4.** Absorption (a) and emission (b) spectra of **RH-2** in toluene, chloroform and ethanol solvent

**Figure S5.** Absorption (a) and emission (b) spectra of **RH-3** in toluene, chloroform and ethanol solvent

**Figure S6.** Absorption (a) and emission (b) spectra of **RH-4** in toluene, chloroform and ethanol solvent

**Figure S7.** Absorption (a) and emission (b) spectra of **RH-5** in toluene, chloroform and ethanol solvent

**Figure S8.** Emission enhancement spectra of **RH-2** in different ratio of glycerol (0 to 80 %) in ethanol

**Figure S9.** Emission enhancement spectra of **RH-3** in different ratio of glycerol (0 to 80 %) in ethanol

**Figure S10.** Emission enhancement spectra of **RH-4** in different ratio of glycerol (0 to 80 %) in ethanol

**Figure S11.** Emission enhancement spectra of **RH-5** in different ratio of glycerol (0 to 80 %) in ethanol

**List of Tables**

**Table S1:** Photophysical properties of **RH-1** in toluene, chloroform and ethanol solvent (spirocyclic and open form)

**Table S2:** Photophysical properties of **RH-2** in toluene, chloroform and ethanol solvent (spirocyclic and open form)

**Table S3:** Photophysical properties of **RH-3** in toluene, chloroform and ethanol solvent (spirocyclic and open form)

**Table S4:** Photophysical properties of **RH-4** in toluene, chloroform and ethanol solvent (spirocyclic and open form)

**Table S5:** Photophysical properties of **RH-5** in toluene, chloroform and ethanol solvent (spirocyclic and open form)

**List of Spectrum**

**Spectrum S1:**  $^1\text{H}$  NMR spectra of **Compound 3** in  $\text{CDCl}_3$

**Spectrum S2:**  $^{13}\text{C}$  NMR spectra of **Compound 3** in  $\text{CDCl}_3$

**Spectrum S3:**  $^1\text{H}$  NMR spectra of **Compound 4** in  $\text{CDCl}_3$

**Spectrum S4:**  $^{13}\text{C}$  NMR spectra of **Compound 4** in  $\text{CDCl}_3$

**Spectrum S5:**  $^1\text{H}$  NMR spectra of compound **6** in  $\text{CDCl}_3$

**Spectrum S6:**  $^{13}\text{C}$  NMR spectra of compound **6** in  $\text{CDCl}_3$

**Spectrum S7:**  $^1\text{H}$  NMR spectra of **Intermediate A** in  $\text{CDCl}_3$

**Spectrum S8:**  $^1\text{H}$  NMR spectra of **Intermediate B** in  $\text{CDCl}_3$

**Spectrum S9:**  $^{13}\text{C}$  NMR spectra of **Intermediate B** in  $\text{CDCl}_3$

**Spectrum S10:**  $^1\text{H}$  NMR spectra of **RH-1** in  $\text{CDCl}_3$

**Spectrum S11:**  $^{13}\text{C}$  NMR spectra of **RH-1** in  $\text{CDCl}_3$

**Spectrum S12:**  $^1\text{H}$  NMR spectra of **RH-2** in  $\text{DMSO-d}_6$

**Spectrum S13:**  $^{13}\text{C}$  NMR spectra of **RH-2** in  $\text{DMSO-d}_6$

**Spectrum S14:**  $^1\text{H}$  NMR spectra of **RH-3** in  $\text{CDCl}_3$

**Spectrum S15:**  $^{13}\text{C}$  NMR spectra of **RH-3** in  $\text{CDCl}_3$

**Spectrum S16:**  $^1\text{H}$  NMR spectra of **RH-4** in  $\text{CDCl}_3$

**Spectrum S17:**  $^{13}\text{C}$  NMR spectra of **RH-4** in  $\text{CDCl}_3$

**Spectrum S18:**  $^1\text{H}$  NMR spectra of **RH-5** in  $\text{CDCl}_3$

**Spectrum S19:**  $^{13}\text{C}$  NMR spectra of **RH-5** in  $\text{CDCl}_3$

**Scheme S1:** Synthesis of intermediate **A** and intermediate **B**

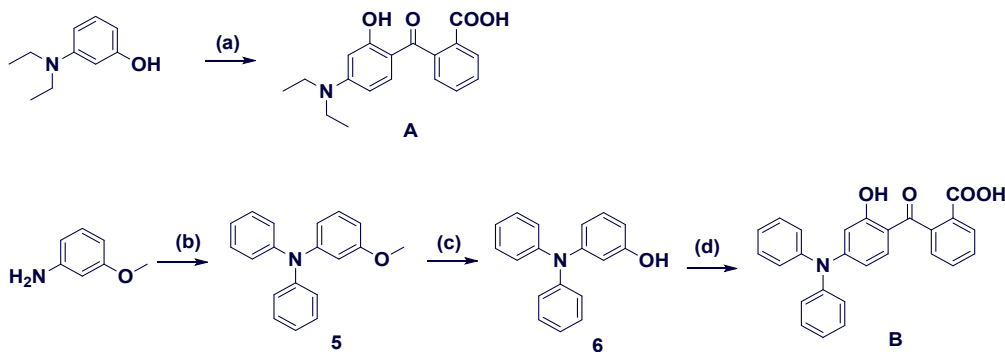

Scheme 2: (a) Phthalic anhydride, toluene, reflux, overnight,  $\text{N}_2$  atmosphere, (b) Iodobenzene, potassium-t-butoxide, 1, 10-phenanthroline/CuI, toluene,  $\text{N}_2$  atmosphere (c) pyridine. HCl, 200  $^\circ\text{C}$ , overnight (d) Phthalic anhydride, anhydrous  $\text{AlCl}_3$ , 1, 2 dichloroethane, 50  $^\circ\text{C}$ , overnight,  $\text{N}_2$  atmosphere.

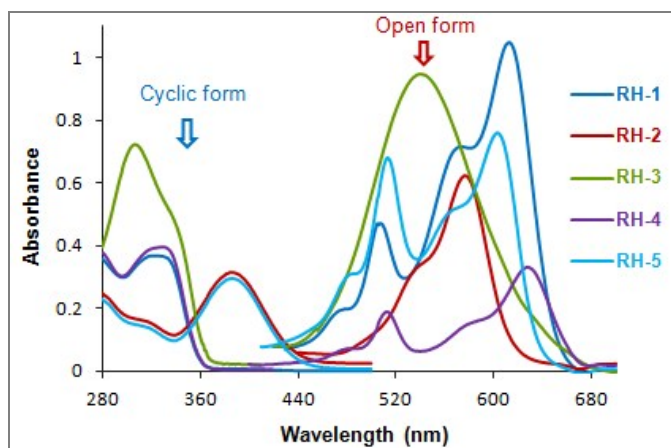

**Figure S1.** Absorption spectra of dyes **RH-1** to **RH-5** for their spirocyclic and open form in chloroform solvent ( $10^{-5}$  M concentrations) at room temperature.

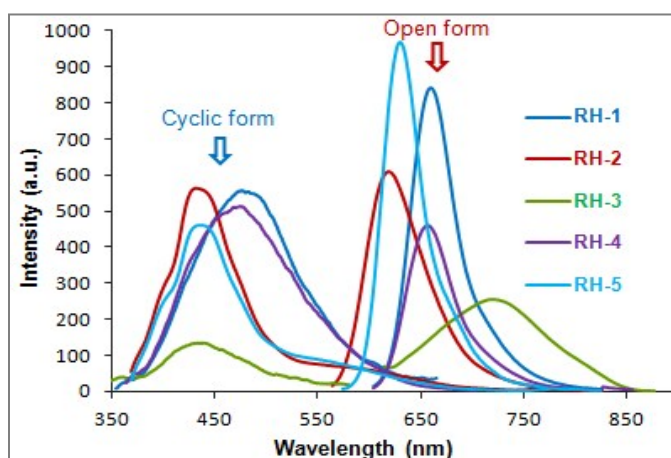

**Figure S2.** Emission spectra of dyes **RH-1** to **RH-5** for their spirocyclic and open form in chloroform solvent ( $10^{-5}$  M concentrations) at room temperature. ( $\lambda_{\text{ex}}$ : 322, 386, 307, 329 and 386 nm for **RH-1** to **RH-5** in cyclic form respectively and  $\lambda_{\text{ex}}$ : 613, 576, 540, 627 and 603 nm for **RH-1** to **RH-5** in open form respectively).

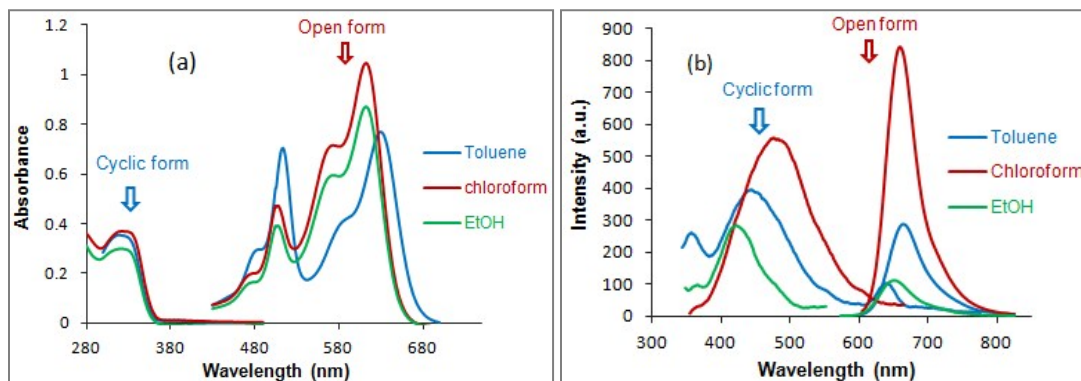

**Figure S3.** Absorption (a) and emission (b) spectra of **RH-1** in toluene, chloroform and ethanol solvent ( $10^{-5}$  M concentrations) at room temperature for their spirocyclic and open form. [ $\lambda_{\text{ex}}$  : 321 nm (cyclic form) and 613 nm (open form)].

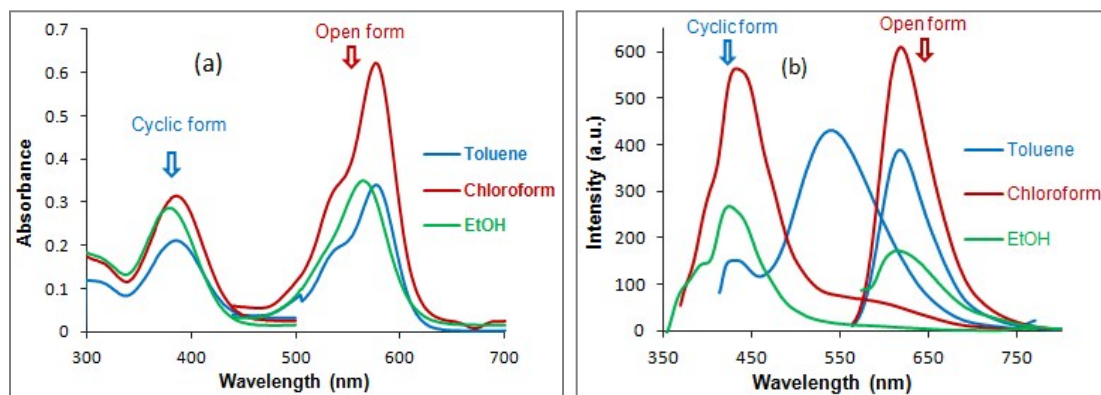

**Figure S4.** Absorption (a) and emission (b) spectra of **RH-2** in toluene, chloroform and ethanol solvent ( $10^{-5}$  M concentrations) at room temperature for their spirocyclic and open form. [ $\lambda_{\text{ex}}$  : 385 nm (cyclic form) and 579 nm (open form)].

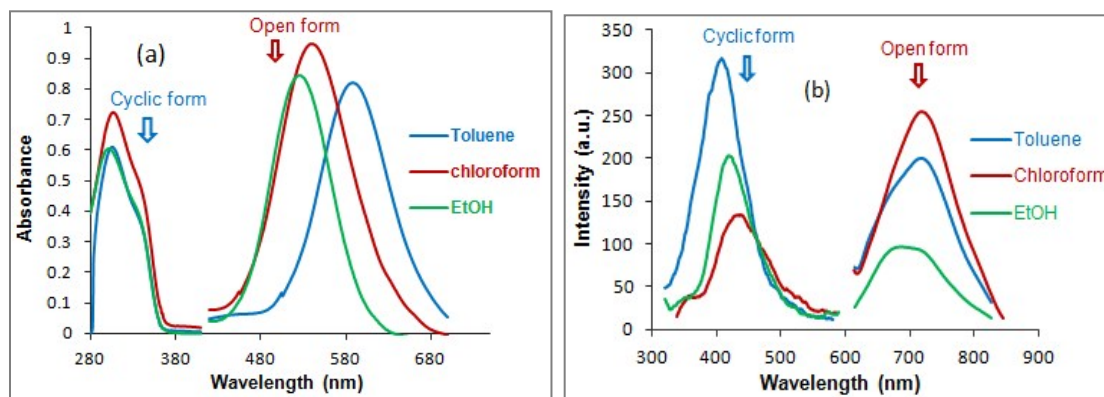

**Figure S5.** Absorption (a) and emission (b) spectra of **RH-3** in toluene, chloroform and ethanol solvent ( $10^{-5}$  M concentrations) at room temperature for their spirocyclic and open form. [ $\lambda_{\text{ex}}$  : 306 nm (cyclic form) and 540 nm (open form)].

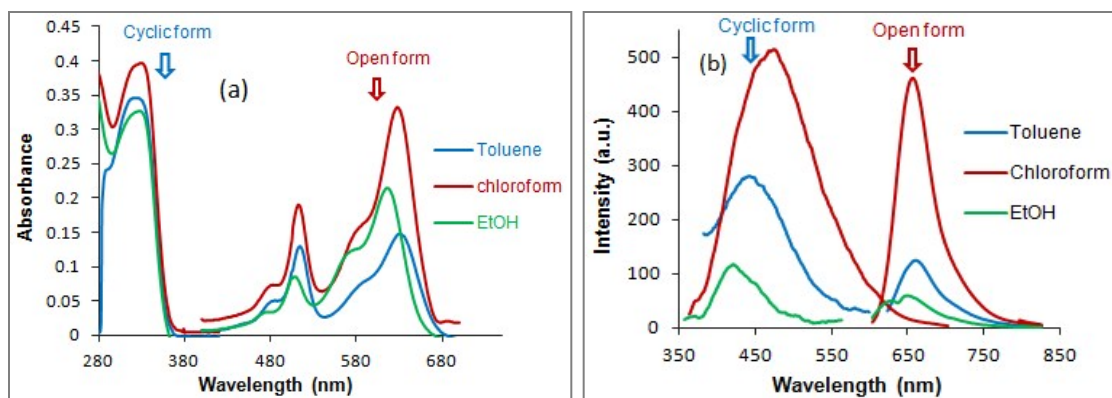

**Figure S6.** Absorption (a) and emission (b) spectra of **RH-4** in toluene, chloroform and ethanol solvent ( $10^{-5}$  M concentrations) at room temperature for their spirocyclic and open form. [ $\lambda_{\text{ex}}$  : 327 nm (cyclic form) and 615 nm (open form)].

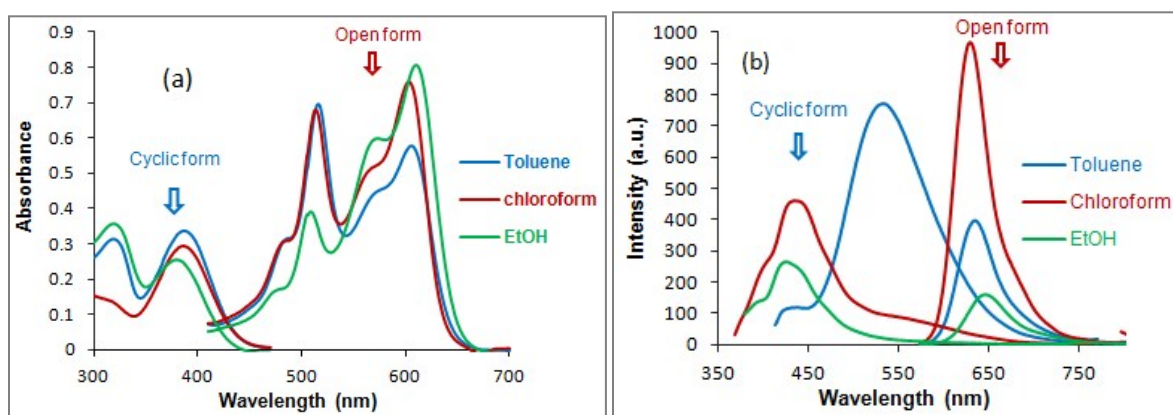

**Figure S7.** Absorption (a) and emission (b) spectra of **RH-5** in toluene, chloroform and ethanol solvent ( $10^{-5}$  M concentrations) at room temperature for their spirocyclic and open form. [ $\lambda_{\text{ex}}$  : 386 nm (cyclic form) and 605 nm (open form)].

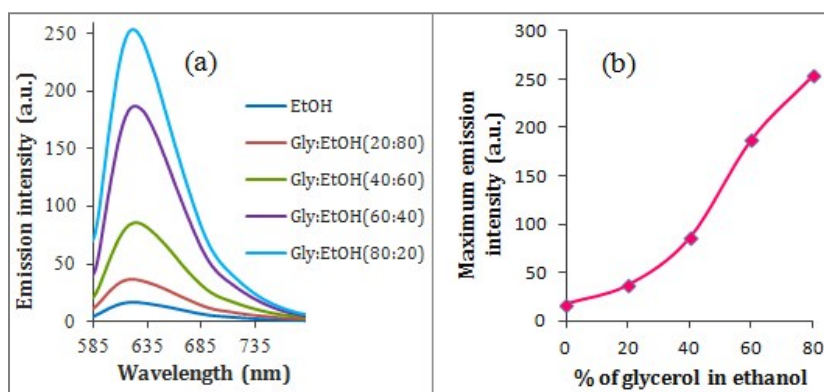

**Figure S8.** (A) Emission enhancement spectra of **RH-2** in different ratio of glycerol (0 to 80 %) in ethanol ( $0.5 \times 10^{-5}$  M concentrations) at room temperature. (B) Plot of maximum emission intensity of **RH-2** versus percentage glycerol (0 to 80 %) in ethanol.

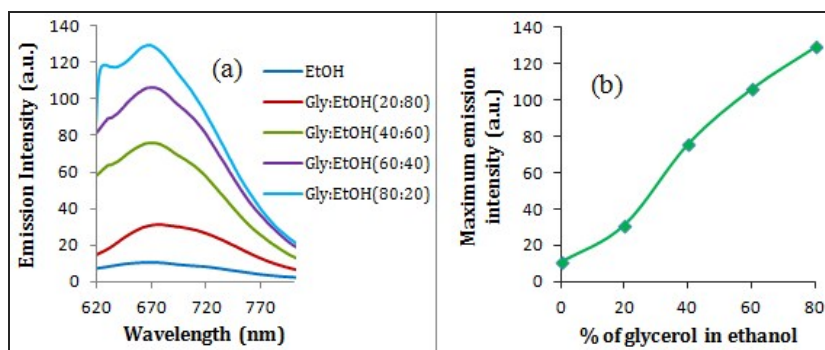

**Figure S9.** (A) Emission enhancement spectra of **RH-3** in different ratio of glycerol (0 to 80 %) in ethanol ( $0.5 \times 10^{-5}$  M concentrations) at room temperature. (B) Plot of maximum emission intensity of **RH-3** versus percentage glycerol (0 to 80 %) in ethanol.

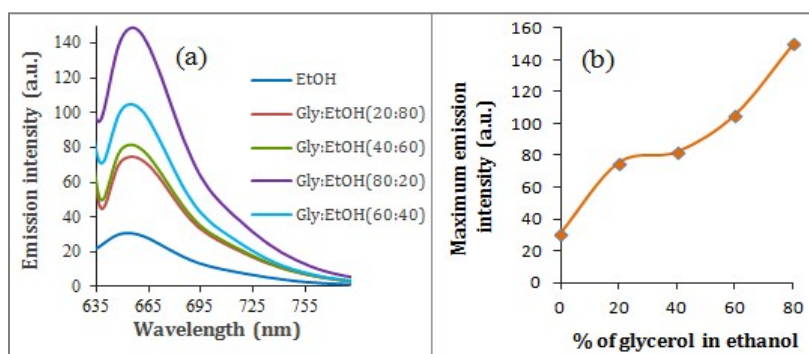

**Figure S10.** (A) Emission enhancement spectra of **RH-4** in different ratio of glycerol (0 to 80 %) in ethanol ( $0.5 \times 10^{-5}$  M concentrations) at room temperature. (B) Plot of maximum emission intensity of **RH-4** versus percentage glycerol (0 to 80 %) in ethanol.

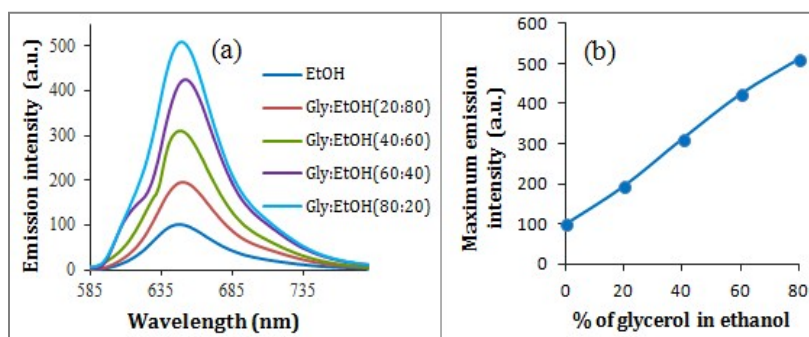

**Figure S11.** (A) Emission enhancement spectra of **RH-5** in different ratio of glycerol (0 to 80 %) in ethanol ( $0.5 \times 10^{-5}$  M concentrations) at room temperature. (B) Plot of maximum emission intensity of **RH-5** versus percentage glycerol (0 to 80 %) in ethanol.

**Table 1.** Photophysical properties of **RH-1** in toluene, chloroform and ethanol solvent (spirocyclic and open form)

| Solvent                 | $\lambda_{\text{abs}}$<br>(nm) | $\epsilon_{\text{max}} \times 10^4$<br>( $\text{M}^{-1} \text{cm}^{-1}$ ) | fwhm<br>(nm) | $\lambda_{\text{ems}}$<br>(nm) | Stokes shift<br>(nm) (cm <sup>-1</sup> ) | f | $\mu_{\text{eg}}$<br>(debye) | $K_r \times 10^8$<br>(cm <sup>-1</sup> ) | $\Phi_F$ |
|-------------------------|--------------------------------|---------------------------------------------------------------------------|--------------|--------------------------------|------------------------------------------|---|------------------------------|------------------------------------------|----------|
| <b>Spirocyclic form</b> |                                |                                                                           |              |                                |                                          |   |                              |                                          |          |

|                         |     |       |    |     |     |      |      |       |      |      |
|-------------------------|-----|-------|----|-----|-----|------|------|-------|------|------|
| <b>Toluene</b>          | 318 | 3.54  | 45 | 443 | 125 | 8873 | 0.68 | 6.79  | 3.54 | ---  |
| <b>CHCl<sub>3</sub></b> | 322 | 3.69  | 48 | 471 | 149 | 9824 | 0.73 | 7.08  | 2.99 | ---  |
| <b>EtOH</b>             | 321 | 3     | 45 | 423 | 102 | 7512 | 0.56 | 6.17  | 2.71 | ---  |
| <b><u>Open form</u></b> |     |       |    |     |     |      |      |       |      |      |
| <b>Toluene</b>          | 630 | 7.68  | 72 | 656 | 26  | 629  | 1.21 | 12.72 | 1.89 | 0.61 |
| <b>CHCl<sub>3</sub></b> | 613 | 10.04 | 80 | 660 | 47  | 1162 | 1.38 | 13.43 | 2.52 | 0.82 |
| <b>EtOH</b>             | 613 | 8.73  | 80 | 652 | 39  | 976  | 1.15 | 12.26 | 1.91 | 0.56 |

**Table 2:** Photophysical properties of **RH-2** in toluene, chloroform and ethanol solvent (spirocyclic and open form)

| <b>Solvent</b>                 | $\lambda_{\text{abs}}$<br>(nm) | $\epsilon_{\text{max}} \times 10^4$<br>(M <sup>-1</sup> cm <sup>-1</sup> ) | <b>fwhm</b><br>(nm) | $\lambda_{\text{ems}}$<br>(nm) | <b>Stokes shift</b><br>(nm) | <b>f</b><br>(cm <sup>-1</sup> ) | $\mu_{\text{eg}}$<br>(debye) | $K_r \times 10^8$<br>(cm <sup>-1</sup> ) | $\Phi_F$ |      |
|--------------------------------|--------------------------------|----------------------------------------------------------------------------|---------------------|--------------------------------|-----------------------------|---------------------------------|------------------------------|------------------------------------------|----------|------|
| <b><u>Spirocyclic form</u></b> |                                |                                                                            |                     |                                |                             |                                 |                              |                                          |          |      |
| <b>Toluene</b>                 | 385                            | 2.11                                                                       | 67                  | 540                            | 155                         | 7456                            | 0.45                         | 6.05                                     | 1.57     | ---  |
| <b>CHCl<sub>3</sub></b>        | 386                            | 3.14                                                                       | 64                  | 432                            | 46                          | 2759                            | 0.63                         | 7.18                                     | 3.62     | ---  |
| <b>EtOH</b>                    | 380                            | 2.85                                                                       | 64                  | 424                            | 44                          | 2731                            | 0.55                         | 6.68                                     | 3.30     | ---  |
| <b><u>Open form</u></b>        |                                |                                                                            |                     |                                |                             |                                 |                              |                                          |          |      |
| <b>Toluene</b>                 | 577                            | 3.39                                                                       | 66                  | 618                            | 41                          | 1150                            | 0.36                         | 6.62                                     | 1.15     | 0.47 |
| <b>CHCl<sub>3</sub></b>        | 576                            | 6.21                                                                       | 64                  | 619                            | 43                          | 1206                            | 0.65                         | 8.90                                     | 1.95     | 0.54 |
| <b>EtOH</b>                    | 564                            | 3.49                                                                       | 65                  | 614                            | 50                          | 1444                            | 0.40                         | 6.90                                     | 1.03     | 0.35 |

**Table 3:** Photophysical properties of **RH-3** in toluene, chloroform and ethanol solvent (spirocyclic and open form)

| <b>Solvent</b>                 | $\lambda_{\text{abs}}$<br>(nm) | $\epsilon_{\text{max}} \times 10^4$<br>(M <sup>-1</sup> cm <sup>-1</sup> ) | <b>fwhm</b><br>(nm) | $\lambda_{\text{ems}}$<br>(nm) | <b>Stokes shift</b><br>(nm) | <b>f</b><br>(cm <sup>-1</sup> ) | $\mu_{\text{eg}}$<br>(debye) | $K_r \times 10^8$<br>(cm <sup>-1</sup> ) | $\Phi_F$ |      |
|--------------------------------|--------------------------------|----------------------------------------------------------------------------|---------------------|--------------------------------|-----------------------------|---------------------------------|------------------------------|------------------------------------------|----------|------|
| <b><u>Spirocyclic form</u></b> |                                |                                                                            |                     |                                |                             |                                 |                              |                                          |          |      |
| <b>Toluene</b>                 | 306                            | 6.09                                                                       | 58                  | 407                            | 101                         | 8110                            | 1.39                         | 9.53                                     | 9.66     | ---  |
| <b>CHCl<sub>3</sub></b>        | 307                            | 7.24                                                                       | 67                  | 436                            | 129                         | 9638                            | 1.87                         | 11.06                                    | 9.52     | ---  |
| <b>EtOH</b>                    | 302                            | 6.05                                                                       | 64                  | 419                            | 117                         | 9246                            | 1.54                         | 9.96                                     | 7.64     | ---  |
| <b><u>Open form</u></b>        |                                |                                                                            |                     |                                |                             |                                 |                              |                                          |          |      |
| <b>Toluene</b>                 | 588                            | 8.18                                                                       | 95                  | 717                            | 129                         | 3060                            | 1.17                         | 12.09                                    | 2.82     | 0.14 |
| <b>CHCl<sub>3</sub></b>        | 540                            | 9.48                                                                       | 100                 | 719                            | 179                         | 4610                            | 1.57                         | 13.44                                    | 3.19     | 0.16 |
| <b>EtOH</b>                    | 525                            | 8.45                                                                       | 81                  | 696                            | 171                         | 4680                            | 1.18                         | 11.51                                    | 2.2      | 0.11 |

**Table 4:** Photophysical properties of **RH-4** in toluene, chloroform and ethanol solvent (spirocyclic and open form)

| Solvent                        | $\lambda_{\text{abs}}$<br>(nm) | $\epsilon_{\text{max}} \times 10^4$<br>(M <sup>-1</sup> cm <sup>-1</sup> ) | fwhm<br>(nm) | $\lambda_{\text{ems}}$<br>(nm) | Stokes shift<br>(nm) | shift<br>(cm <sup>-1</sup> ) | f    | $\mu_{\text{eg}}$<br>(debye) | $K_r \times 10^8$<br>(cm <sup>-1</sup> ) | $\Phi_F$ |
|--------------------------------|--------------------------------|----------------------------------------------------------------------------|--------------|--------------------------------|----------------------|------------------------------|------|------------------------------|------------------------------------------|----------|
| <b><u>Spirocyclic form</u></b> |                                |                                                                            |              |                                |                      |                              |      |                              |                                          |          |
| Toluene                        | 323                            | 3.46                                                                       | 63           | 443                            | 120                  | 8386                         | 0.78 | 7.32                         | 4.30                                     | ---      |
| CHCl <sub>3</sub>              | 329                            | 3.96                                                                       | 68           | 475                            | 146                  | 9343                         | 0.92 | 8.02                         | 4.41                                     | ---      |
| EtOH                           | 327                            | 3.26                                                                       | 65           | 422                            | 95                   | 6884                         | 0.74 | 7.18                         | 4.19                                     | ---      |
| <b><u>Open form</u></b>        |                                |                                                                            |              |                                |                      |                              |      |                              |                                          |          |
| Toluene                        | 629                            | 1.48                                                                       | 70           | 661                            | 32                   | 770                          | 0.22 | 5.48                         | 0.37                                     | 0.31     |
| CHCl <sub>3</sub>              | 627                            | 3.32                                                                       | 58           | 657                            | 30                   | 728                          | 0.44 | 7.63                         | 0.77                                     | 0.52     |
| EtOH                           | 615                            | 2.14                                                                       | 74           | 650                            | 35                   | 876                          | 0.26 | 5.82                         | 0.46                                     | 0.23     |

**Table 5:** Photophysical properties of **RH-5** in toluene, chloroform and ethanol solvent (spirocyclic and open form)

| Solvent                        | $\lambda_{\text{abs}}$<br>(nm) | $\epsilon_{\text{max}} \times 10^4$<br>(M <sup>-1</sup> cm <sup>-1</sup> ) | fwhm<br>(nm) | $\lambda_{\text{ems}}$<br>(nm) | Stokes shift<br>(nm) | shift<br>(cm <sup>-1</sup> ) | f    | $\mu_{\text{eg}}$<br>(debye) | $K_r \times 10^8$<br>(cm <sup>-1</sup> ) | $\Phi_F$ |
|--------------------------------|--------------------------------|----------------------------------------------------------------------------|--------------|--------------------------------|----------------------|------------------------------|------|------------------------------|------------------------------------------|----------|
| <b><u>Spirocyclic form</u></b> |                                |                                                                            |              |                                |                      |                              |      |                              |                                          |          |
| Toluene                        | 387                            | 3.37                                                                       | 63           | 534                            | 147                  | 7113                         | 0.63 | 7.23                         | 2.31                                     | ---      |
| CHCl <sub>3</sub>              | 386                            | 2.95                                                                       | 61           | 436                            | 50                   | 2971                         | 0.55 | 6.73                         | 2.98                                     | ---      |
| EtOH                           | 380                            | 2.54                                                                       | 68           | 424                            | 44                   | 2731                         | 0.49 | 6.27                         | 2.61                                     | ---      |
| <b><u>Open form</u></b>        |                                |                                                                            |              |                                |                      |                              |      |                              |                                          |          |
| Toluene                        | 605                            | 5.78                                                                       | 96           | 635                            | 30                   | 781                          | 1.17 | 12.28                        | 1.85                                     | 0.71     |
| CHCl <sub>3</sub>              | 603                            | 7.6                                                                        | 91           | 630                            | 27                   | 711                          | 1.28 | 12.81                        | 2.06                                     | 0.86     |
| EtOH                           | 610                            | 8.05                                                                       | 82           | 646                            | 36                   | 914                          | 1.16 | 12.25                        | 1.94                                     | 0.59     |

**Spectrum S1:** <sup>1</sup>H NMR spectra of **Compound 3** in CDCl<sub>3</sub>



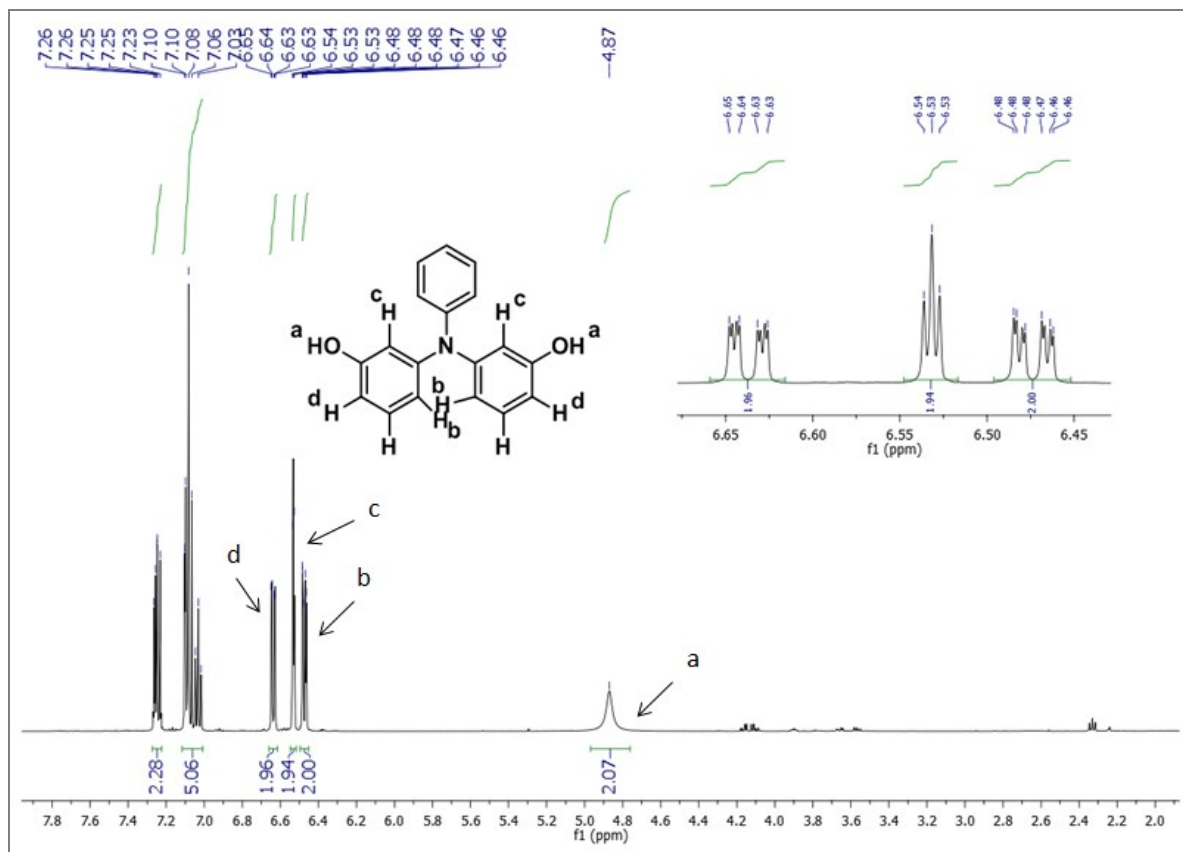

**Spectrum S2:**  $^{13}\text{C}$  NMR spectra of **Compound 3** in  $\text{CDCl}_3$

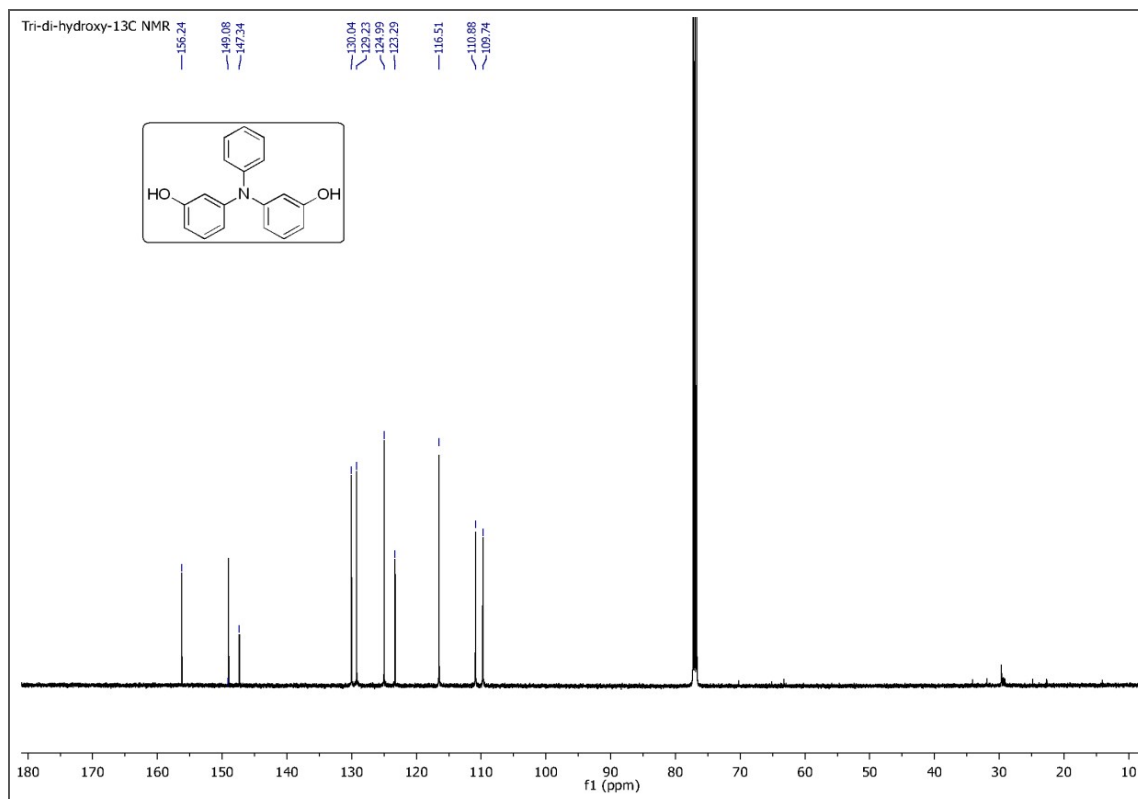

**Spectrum S3:**  $^1\text{H}$  NMR spectra of **Compound 4** in  $\text{CDCl}_3$

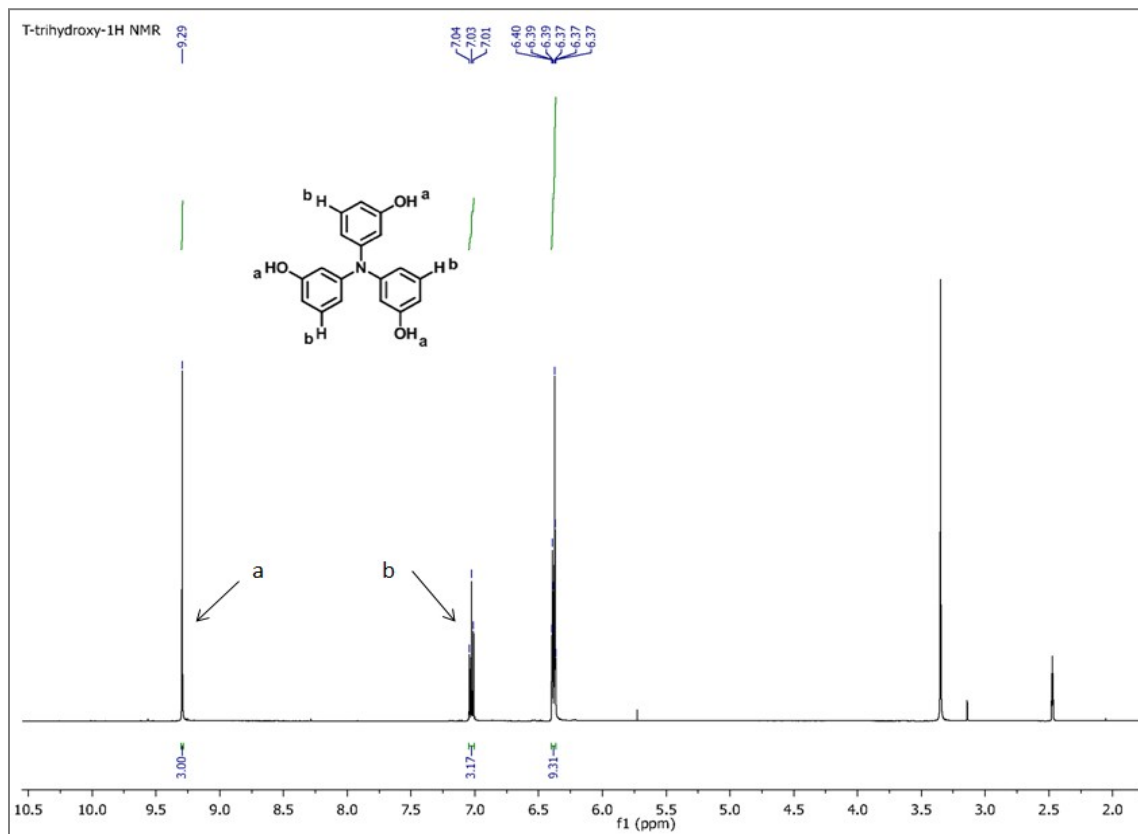

**Spectrum S4:**  $^{13}\text{C}$  NMR spectra of **Compound 4** in  $\text{CDCl}_3$

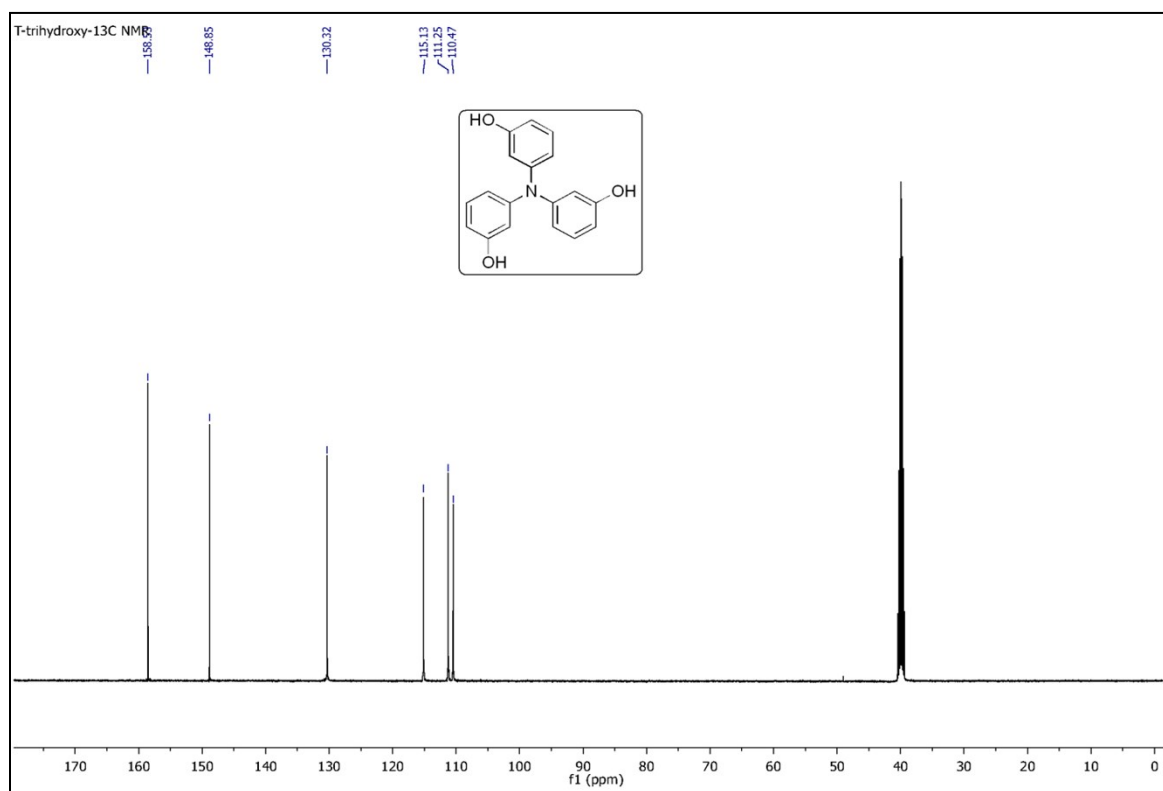

**Spectrum S5:**  $^1\text{H}$  NMR spectra of compound **6** in  $\text{CDCl}_3$

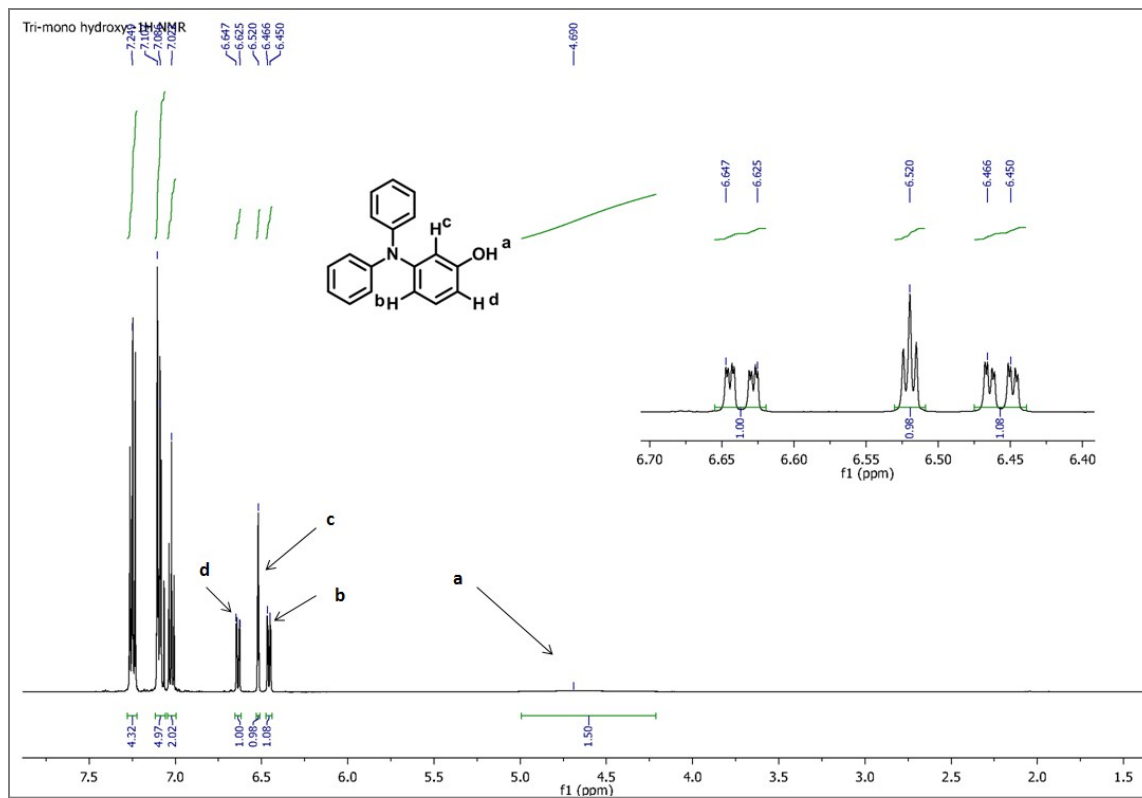

**Spectrum S6:** <sup>13</sup>C NMR spectra of compound 6 in CDCl<sub>3</sub>

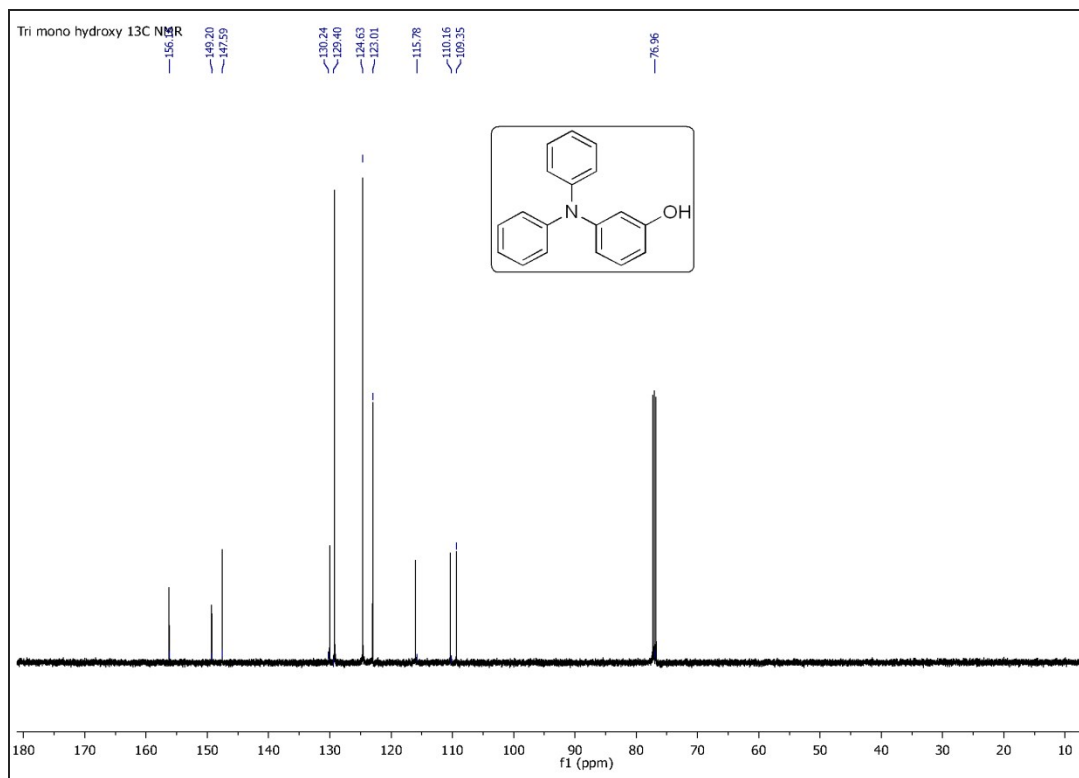

Spectrum S7:  $^1\text{H}$  NMR spectra of **Intermediate A** in  $\text{CDCl}_3$

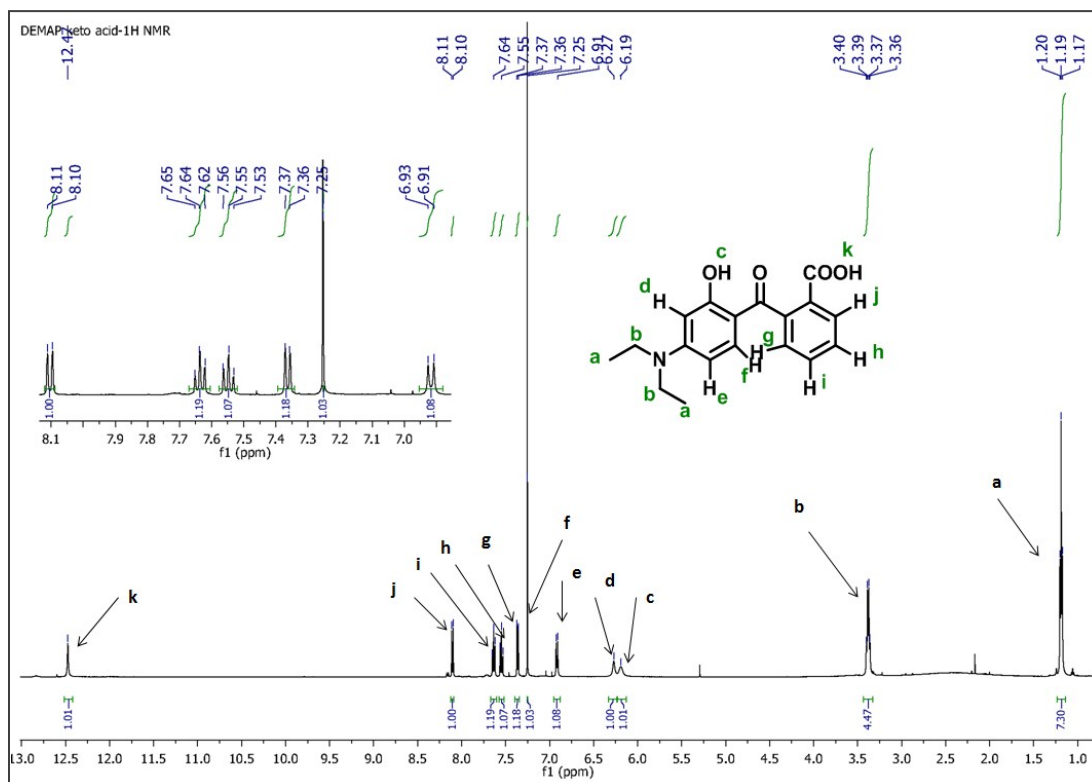

**Spectrum S8:**  $^1\text{H}$  NMR spectra of **Intermediate B** in  $\text{CDCl}_3$

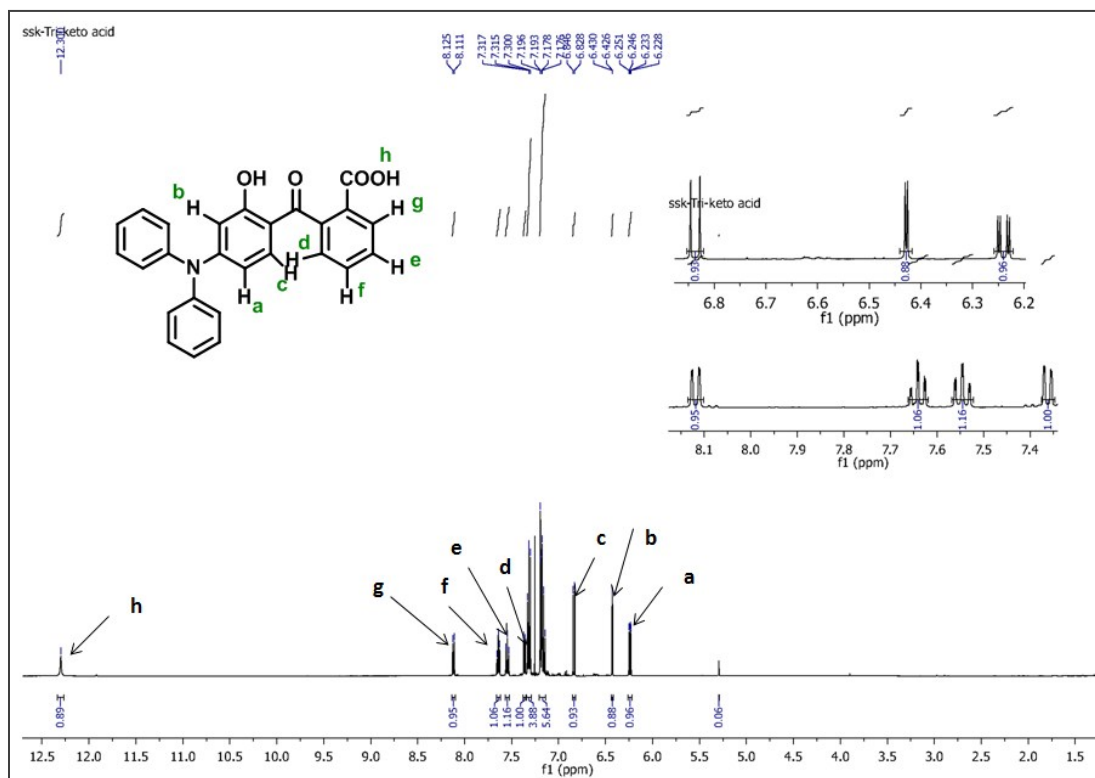

**Spectrum S9:**  $^{13}\text{C}$  NMR spectra of **Intermediate B** in  $\text{CDCl}_3$

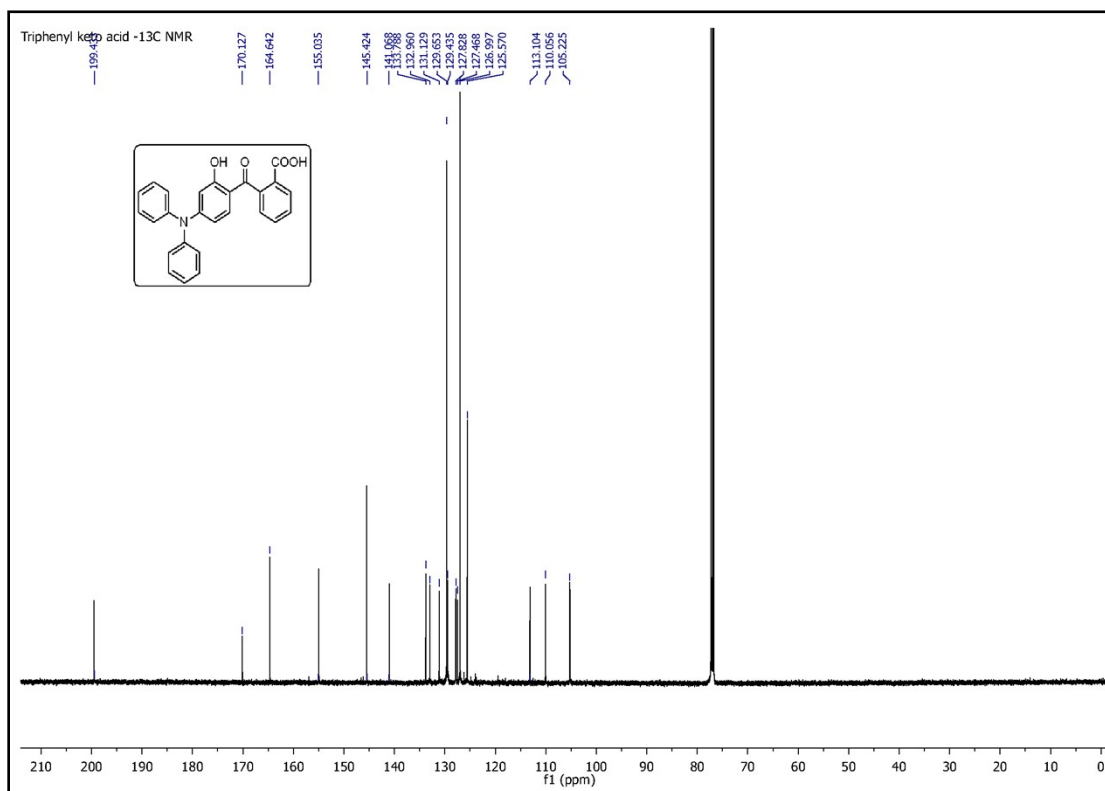

**Spectrum S10:**  $^1\text{H}$  NMR spectra of **RH-1** in  $\text{CDCl}_3$

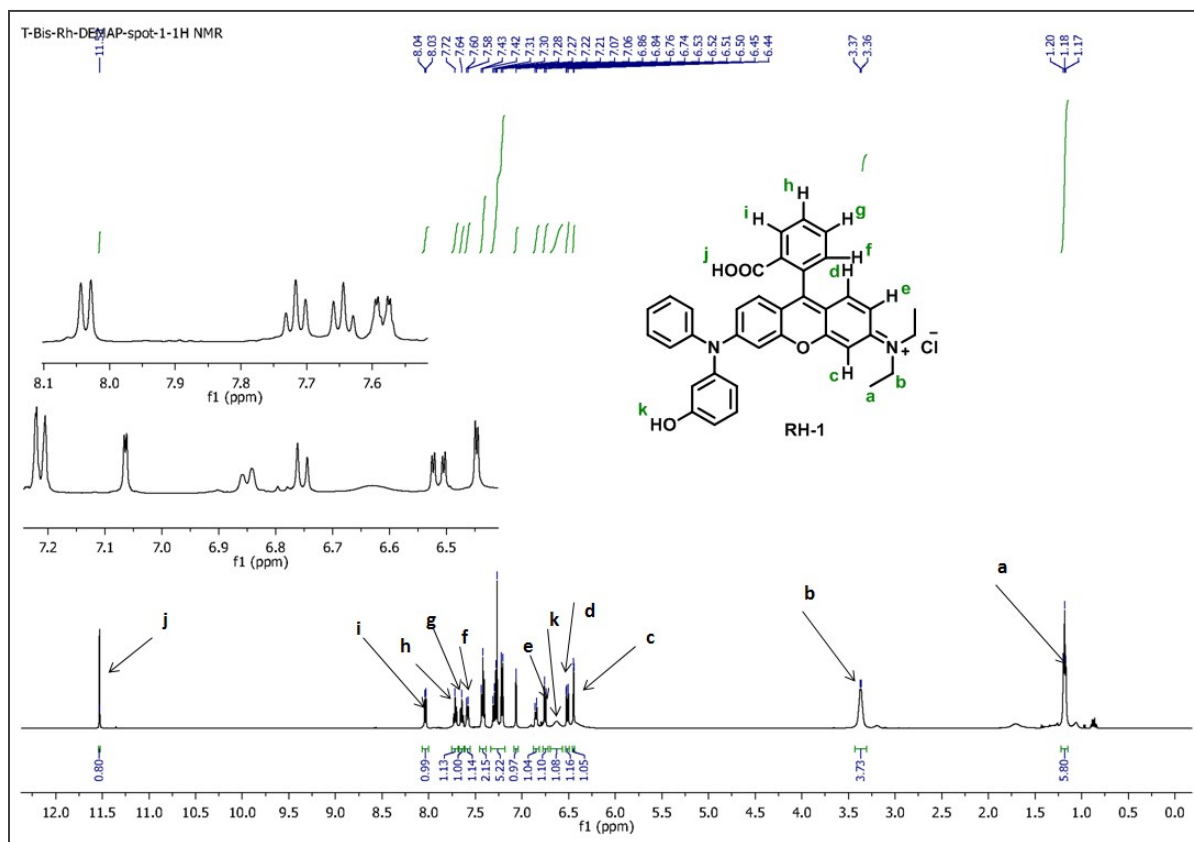

**Spectrum S11:**  $^{13}\text{C}$  NMR spectra of **RH-1** in  $\text{DMSO-d}_6$

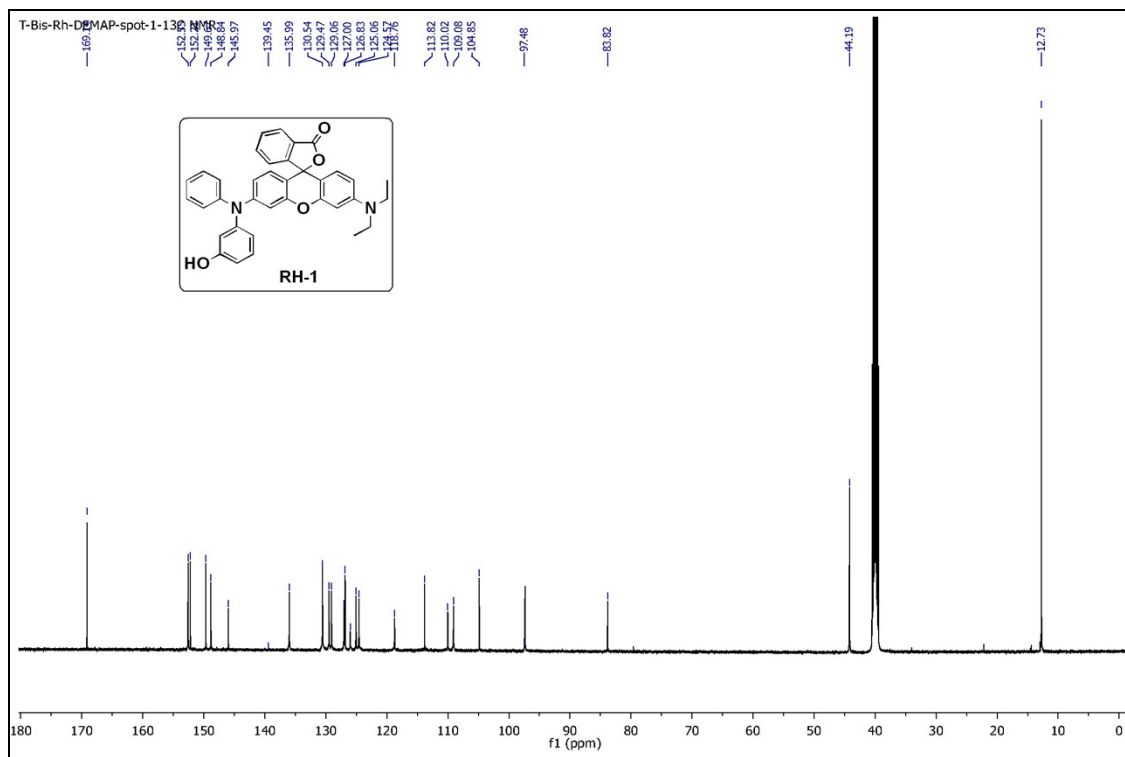

Spectrum S12:  $^1\text{H}$  NMR spectra of **RH-2** in  $\text{DMSO-d}_6$

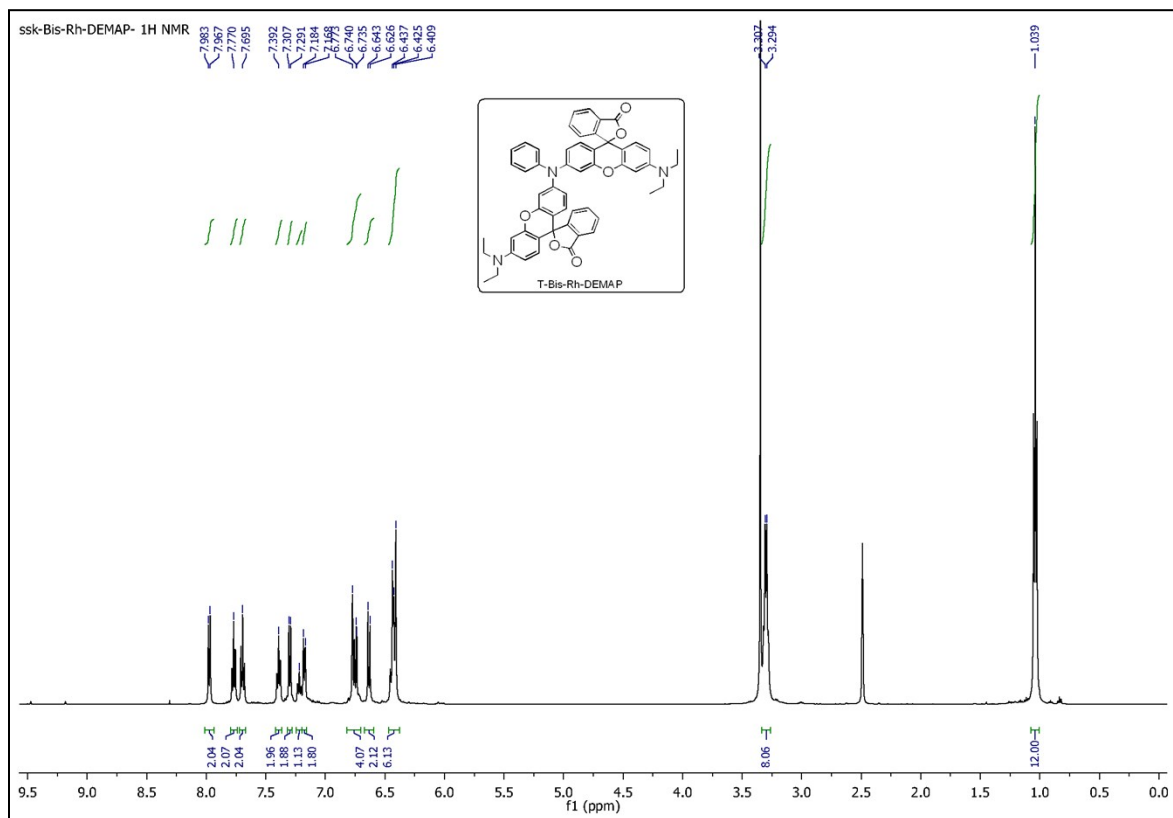



**Spectrum S13:**  $^{13}\text{C}$  NMR spectra of **RH-2** in  $\text{DMSO-d}_6$

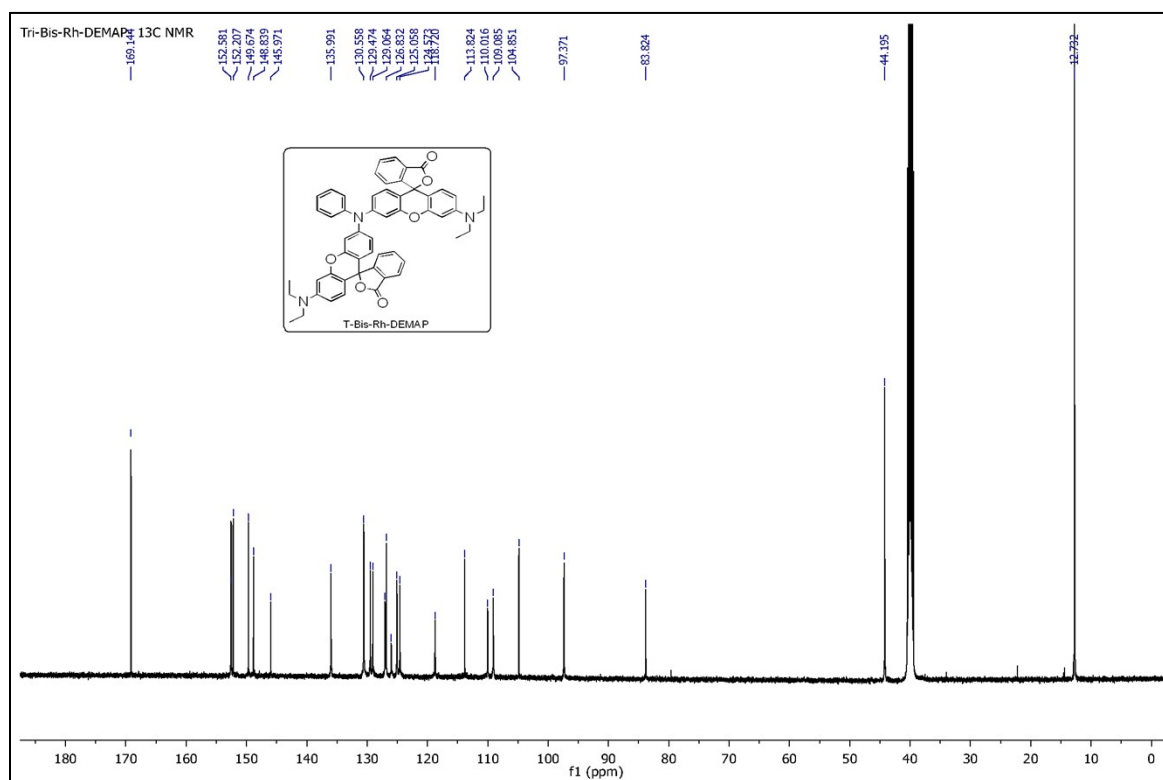

**Spectrum S14:**  $^1\text{H}$  NMR spectra of **RH-3** in  $\text{CDCl}_3$

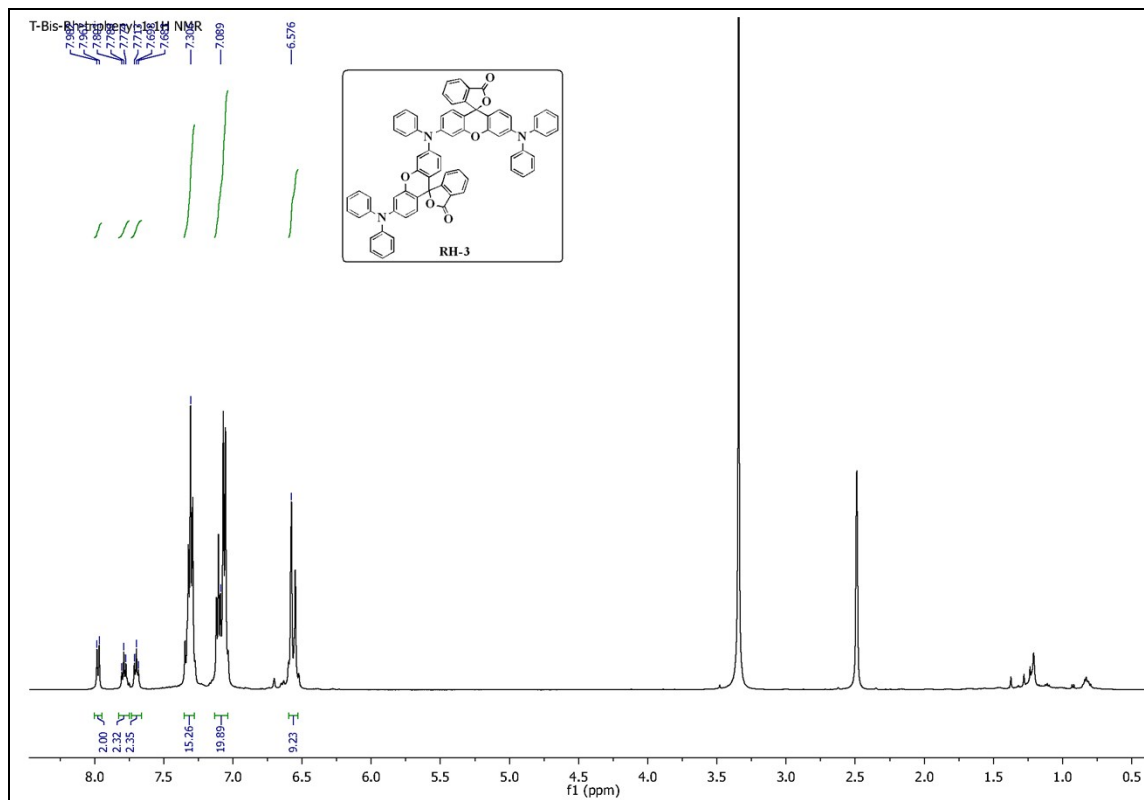

**Spectrum S15:**  $^{13}\text{C}$  NMR spectra of **RH-3** in  $\text{CDCl}_3$

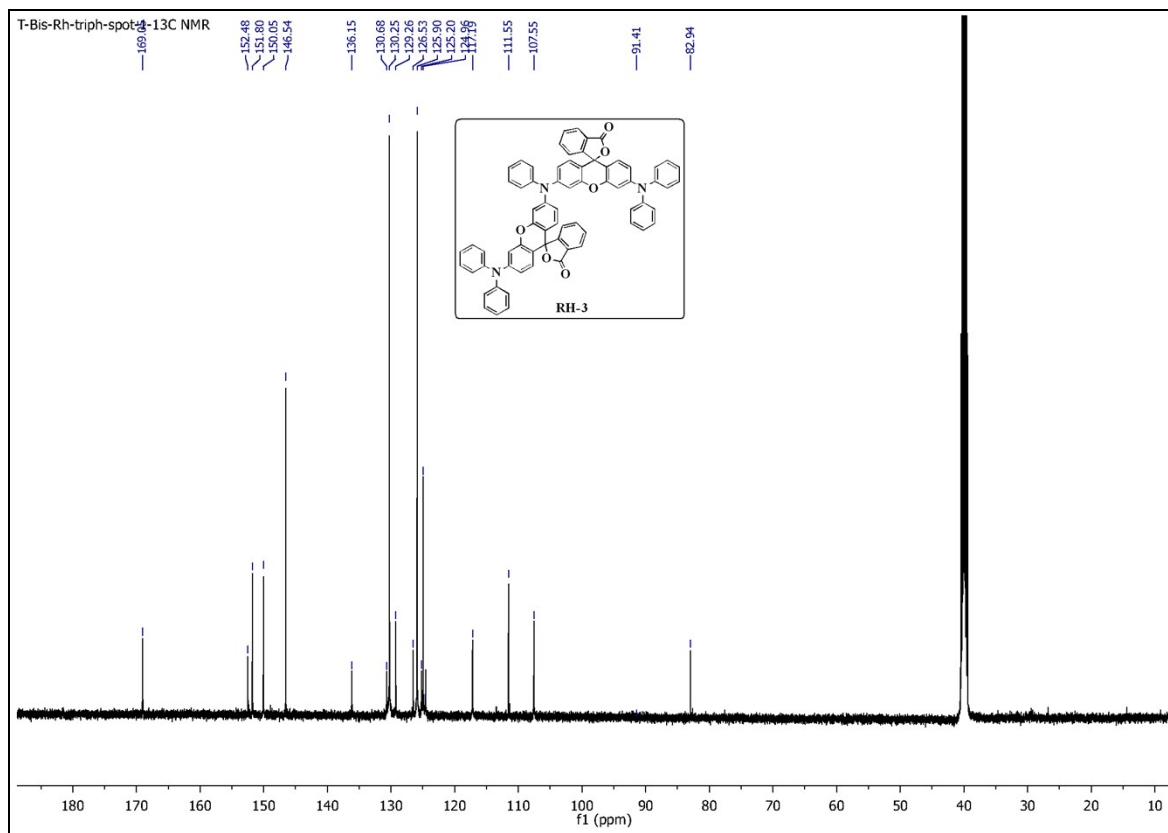

**Spectrum S16:**  $^1\text{H}$  NMR spectra of **RH-4** in  $\text{CDCl}_3$

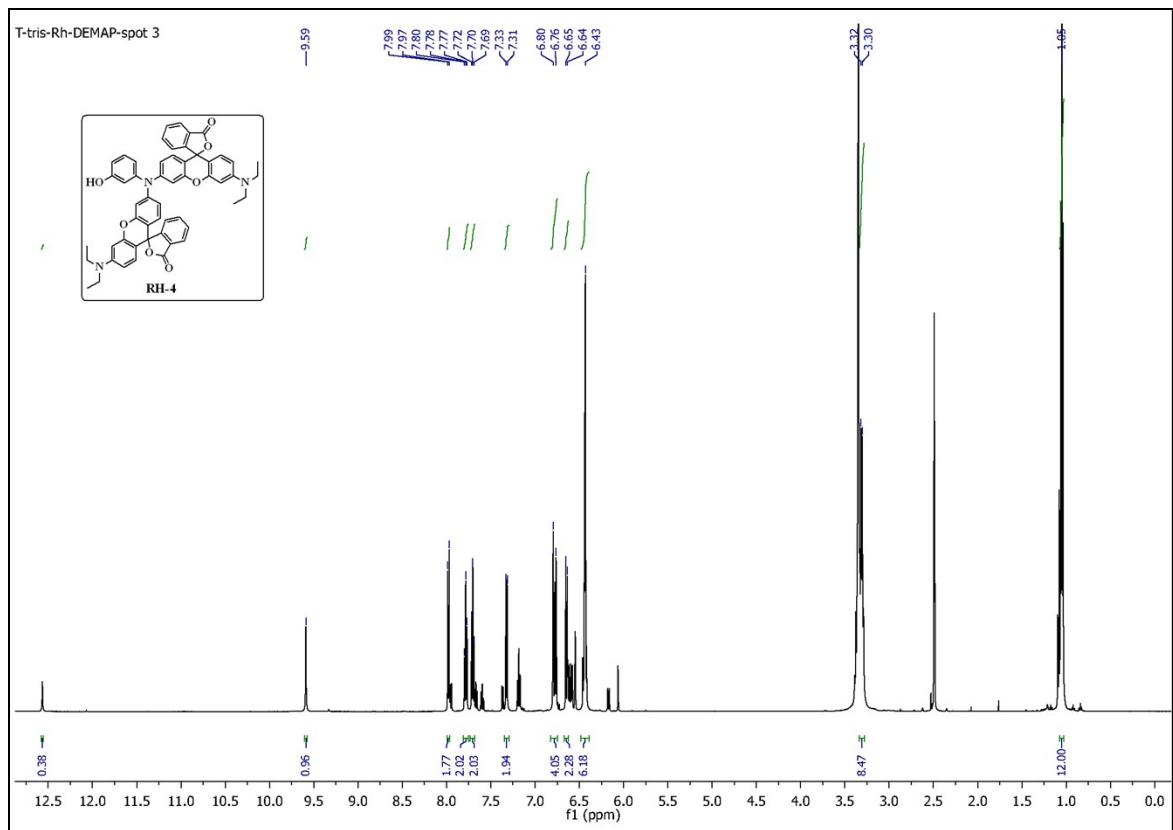

Spectrum S17:  $^{13}\text{C}$  NMR spectra of RH-4 in  $\text{CDCl}_3$

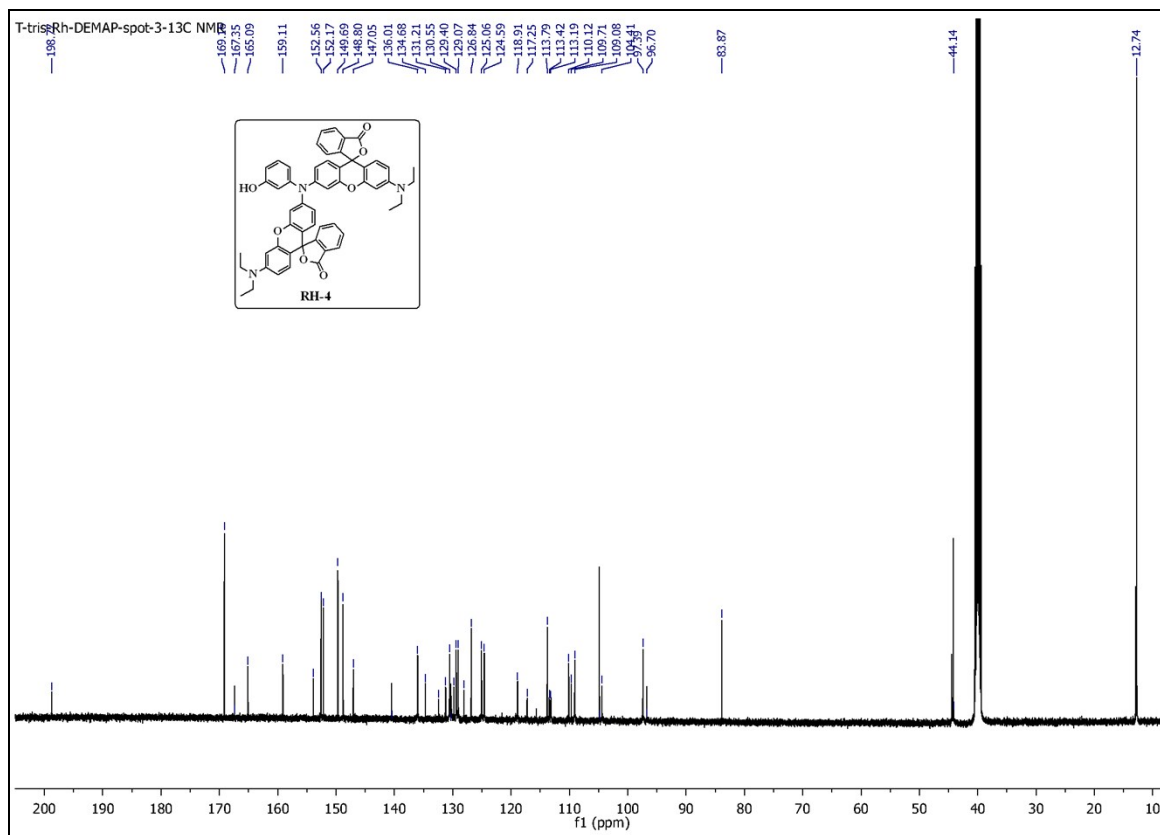

**Spectrum S18:**  $^1\text{H}$  NMR spectra of **RH-5** in  $\text{CDCl}_3$

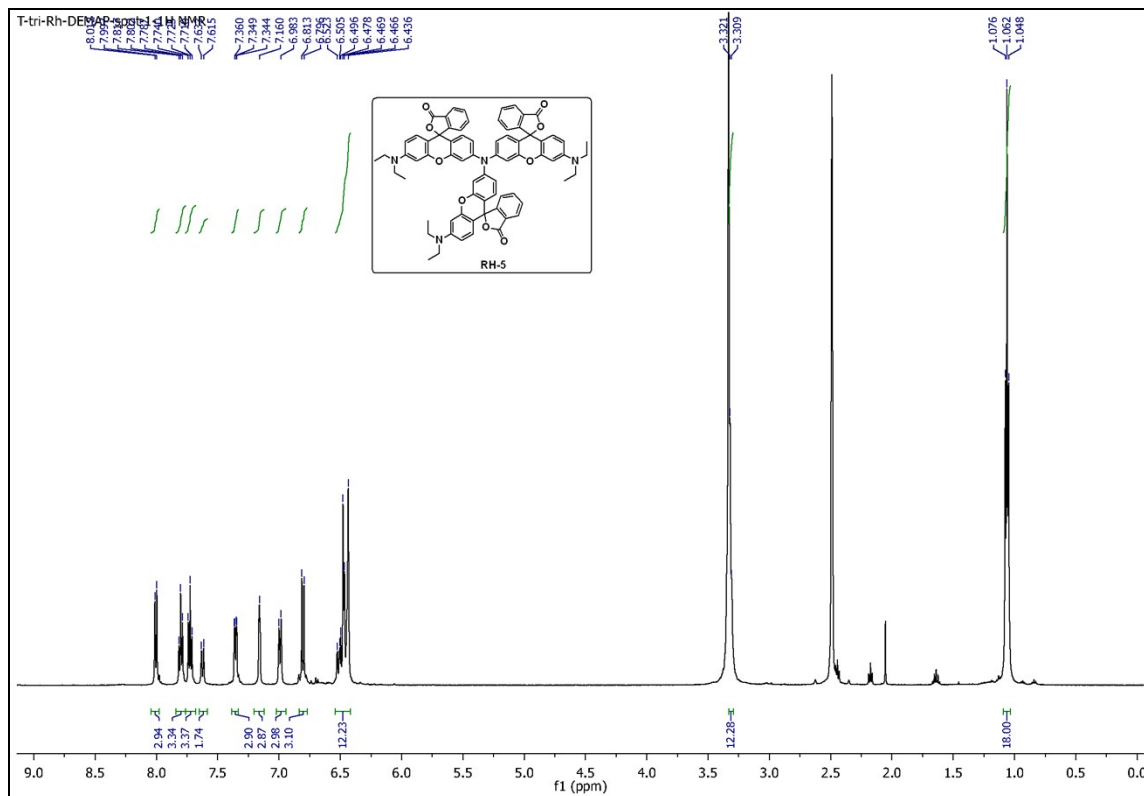

Spectrum S19:  $^{13}\text{C}$  NMR spectra of RH-5 in  $\text{CDCl}_3$

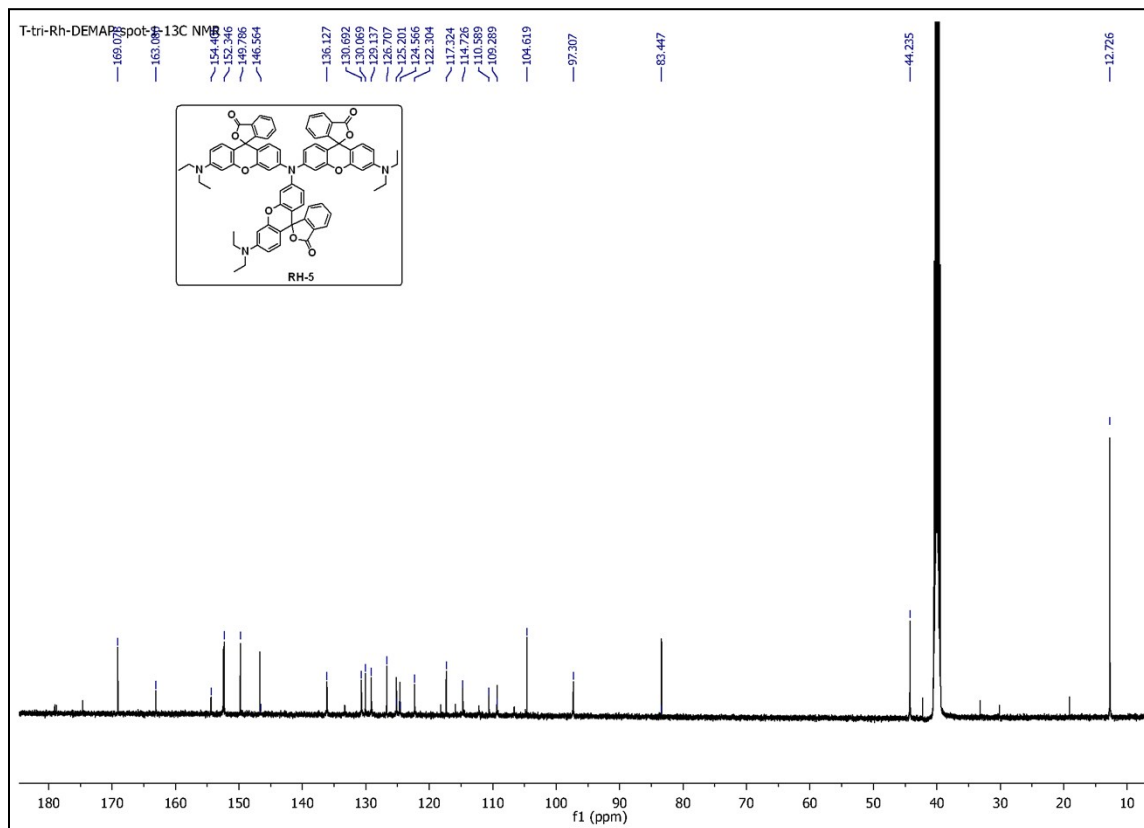

Supplement: c6ra19899f1.pdf [file c6ra19899f1.pdf]
